# Supplementary material for: The genotype-phenotype map of an evolving digital organism
Source: PubMed Central journal article supplement (PMC5348039; doi:10.1371/journal.pcbi.1005414), 2017-02-27
Supplement: pcbi.1005414.s001.pdf [file pcbi.1005414.s001.pdf]

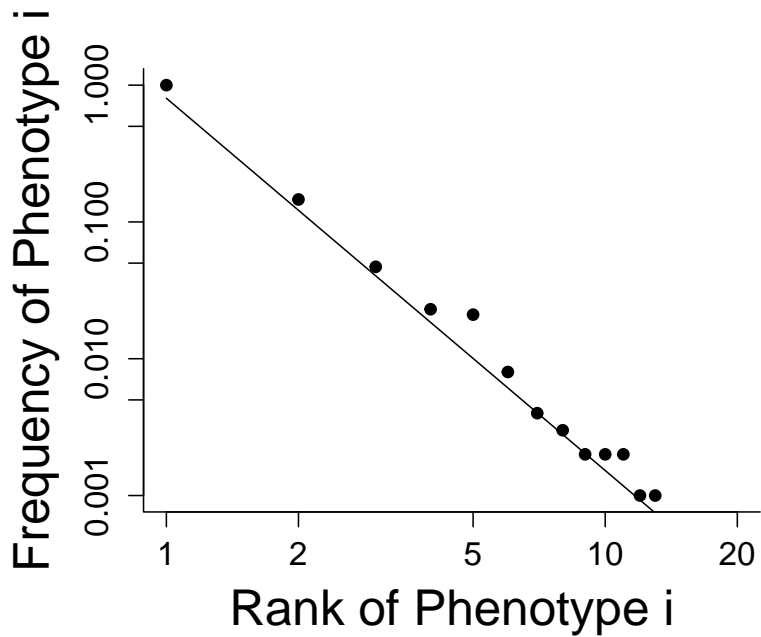

Figure S1: **Genotypes with different phenotypes occupy different fractions of genotype space.** The double-logarithm plot shows the rank of phenotype  $i$  (x-axis) versus a measure of its frequency  $f(i)$  (y-axis), in genotype space. Data are shown for the 13 most frequent phenotypes, and were obtained by computing the phenotypes of the  $2500 \times 1000$  1-mutant neighbors of 1000 genotypes uniformly sampled from genotype space. The frequency shown is the number of 1-mutant neighborhoods in which phenotype  $i$  appeared at least once. The rank distribution follows a power law.
