# Supplementary material for: The genotype-phenotype map of an evolving digital organism
Source: PubMed Central journal article supplement (PMC5348039; doi:10.1371/journal.pcbi.1005414), 2017-02-27
Supplement: pcbi.1005414.s010.pdf [file pcbi.1005414.s010.pdf]

## Appendix

### **Self-replication and genotype-phenotype mapping of a digital organism.**

The entire replication cycle of a digital organism with the smallest genome required to perform the logic operation NAND is depicted in 75 steps. In each step, the genotype of the parent organism is represented on the left as a circular set of 12 instructions (depicted as letters). The growing offspring is represented to the right of its parent. An instruction pointer (black) indicates the instruction that is going to be executed. Three additional pointers—read-head (blue), write-head (red), and flow-head (green)—are used to specify positions in the CPU's memory of the organism. Initially (step 1), the instruction pointer and the three heads are located on the first instruction of this organism's genome (*w: h-alloc*). Arrows indicate the movement of the instruction pointer and write-head from the previous to the current position. Beyond the instructions necessary for copying the genome, the genetic language in Avida contains instructions for storing and manipulating 32-bit numbers in buffers (input-1 and input-2) and registers (AX, BX, and CX). In this cartoon, each binary number is represented as a sequence of 32 boxes, one for each bit. The value of each bit is depicted as a black box if it is 1 and as a white box if it is 0. When an input-output instruction is executed (*y*), the organism outputs the number stored in the BX register. The latest output number provided by the organism after executing an input-output instruction is shown as a sequence of 32 boxes as well. No-operation instructions (i.e., *a*, *b*, and *c*) do not do anything when executed but modify the behavior of the instruction preceding them (e.g., steps 3 and 4). A copy command (instruction *v*) reads the instruction indicated by the position of the read-head and writes that instruction in an empty

memory space located at the position indicated by the write-head (e.g., step 7). Other instructions (e.g., the move-head instruction represented by the letter *g*) move the instruction pointer to a position indicated by the flow-head. But, if the no-operation instruction nop-C (*c*) precedes an instruction that will move a head (e.g., in step 3 *c* precedes *g*), the write-head (instead of the instruction pointer) is moved towards the flow-head. For each step, we provide a short description explaining what the instruction to be executed will do. The current values of the binary numbers stored in the buffers and registers are shown before the execution of the corresponding instruction. In step 20, the output that will be provided by the execution of an input-output instruction is the result of applying the NAND logic operation on the two input numbers previously stored in the buffers. The result of the NAND logic operation is 0 if and only if the value of the bit of the two inputs is 1, and 1 otherwise. In the next step (21), boxes depicting the output number are colored in red instead of black when the bit value is 1 to highlight the accomplishment of the logic operation). After completing genome replication, the parent organism “buds off” its offspring. Then, the cycle starts again for both organisms independently (each one located in its own memory space).









23.

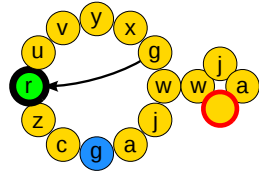

**(r) swap**

This instruction swaps the contents of the BX register with its complement (CX register).

|             |                                  |
|-------------|----------------------------------|
| input-1     | 00000000000000000000000000000000 |
| input-2     | 00000000000000000000000000000000 |
| register-AX | 00000000000000000000000000000000 |
| register-BX | 00000000000000000000000000000000 |
| register-CX | 00000000000000000000000000000000 |
| output      | 00000000000000000000000000000000 |

24.

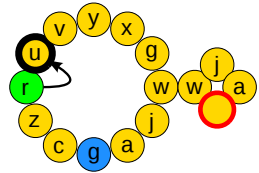

**(u) nand**

This instruction reads in the contents of the BX and CX registers and performs a bitwise NAND operation on them. The result of this operation is placed in the BX register.

|             |                                  |
|-------------|----------------------------------|
| input-1     | 00000000000000000000000000000000 |
| input-2     | 00000000000000000000000000000000 |
| register-AX | 00000000000000000000000000000000 |
| register-BX | 00000000000000000000000000000000 |
| register-CX | 00000000000000000000000000000000 |
| output      | 00000000000000000000000000000000 |

25.

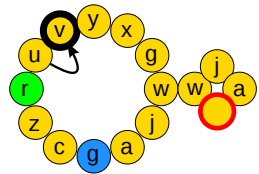

**(v) h-copy**

This instruction reads in the contents of the organism's memory at the position of the red-head (blue), copies that to the position of the write-head (red), and advances both heads.

|             |                                  |
|-------------|----------------------------------|
| input-1     | 00000000000000000000000000000000 |
| input-2     | 00000000000000000000000000000000 |
| register-AX | 00000000000000000000000000000000 |
| register-BX | 00000000000000000000000000000000 |
| register-CX | 00000000000000000000000000000000 |
| output      | 00000000000000000000000000000000 |

26.

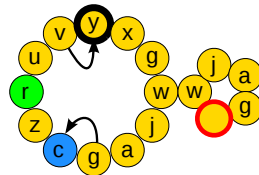

**(y) input-output**

This instruction takes the contents of the BX register and outputs it, checking it for any tasks that may have been performed. It will then place a new input into BX.

|             |                                  |
|-------------|----------------------------------|
| input-1     | 00000000000000000000000000000000 |
| input-2     | 00000000000000000000000000000000 |
| register-AX | 00000000000000000000000000000000 |
| register-BX | 00000000000000000000000000000000 |
| register-CX | 00000000000000000000000000000000 |
| output      | 00000000000000000000000000000000 |

27.

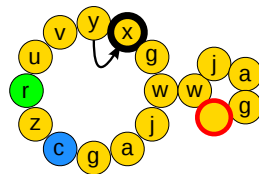

**(x) h-divide**

This instruction is used by an organism to divide off a finished offspring located between the read-head and the write-head. Since the offspring is not finished yet, nothing happens.

|             |                                  |
|-------------|----------------------------------|
| input-1     | 00000000000000000000000000000000 |
| input-2     | 00000000000000000000000000000000 |
| register-AX | 00000000000000000000000000000000 |
| register-BX | 00000000000000000000000000000000 |
| register-CX | 00000000000000000000000000000000 |
| output      | 00000000000000000000000000000000 |

28.

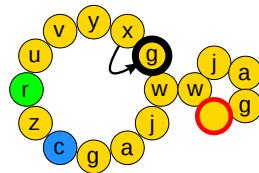

**(g) move-head**

This instruction will cause the instruction pointer (black) to jump to the position in memory of the flow-head.

|             |                                  |
|-------------|----------------------------------|
| input-1     | 00000000000000000000000000000000 |
| input-2     | 00000000000000000000000000000000 |
| register-AX | 00000000000000000000000000000000 |
| register-BX | 00000000000000000000000000000000 |
| register-CX | 00000000000000000000000000000000 |
| output      | 00000000000000000000000000000000 |
